# Supplementary material for: Unravelling the Structural and Molecular Basis Responsible for the Anti-Biofilm Activity of Zosteric Acid
Source: PubMed Central journal article supplement (PMC4488431; doi:10.1371/journal.pone.0131519), 2015-07-01
Supplement: pone.0131519.s002.pdf [file pone.0131519.s002.pdf]

**S1A Table. Planktonic growth and cell adhesion in the presence of ZA and compounds 1-6.**

| Cmpd | Conc. (μM) | Planktonic growth                          |               |          | Cell adhesion                        |               |          |
|------|------------|--------------------------------------------|---------------|----------|--------------------------------------|---------------|----------|
|      |            | A <sub>600</sub> /min (x10 <sup>-3</sup> ) | Reduction (%) | Code (a) | N. adhered cells (x10 <sup>7</sup> ) | Reduction (%) | Code (b) |
| ZA   | 0          | 1.28±0.03 <sup>a</sup>                     | 0.00          | 0        | 1.92±0.18 <sup>b</sup>               | 0.00          | 0        |
|      | 0.183      | 1.32±0.06 <sup>a</sup>                     | 2.86          | 0        | 2.77±0.17 <sup>d</sup>               | 44.59         | 1        |
|      | 1.83       | 1.31±0.04 <sup>a</sup>                     | 1.76          | 0        | 1.54±0.29 <sup>c</sup>               | -19.76        | 0        |
|      | 18.3       | 1.29±0.04 <sup>a</sup>                     | 0.11          | 0        | 1.55±0.19 <sup>c</sup>               | -19.34        | 0        |
|      | 183        | 1.30±0.04 <sup>a</sup>                     | 1.07          | 0        | 1.39±0.13 <sup>c</sup>               | -27.67        | -1       |
|      | 1830       | 1.30±0.04 <sup>a</sup>                     | 1.21          | 0        | 0.56±0.12 <sup>a</sup>               | -70.56        | -3       |
| 1    | 0          | 1.28±0.03 <sup>abc</sup>                   | 0.00          | 0        | 1.92±0.18 <sup>b</sup>               | 0.00          | 0        |
|      | 0.183      | 1.31±0.03 <sup>ab</sup>                    | 2.06          | 0        | 2.29±0.16 <sup>b</sup>               | 19.37         | 0        |
|      | 1.83       | 1.26±0.04 <sup>abc</sup>                   | -1.72         | 0        | 1.03±0.14 <sup>ce</sup>              | -46.05        | -3       |
|      | 18.3       | 1.23±0.02 <sup>abc</sup>                   | -3.99         | 0        | 1.42±0.24 <sup>de</sup>              | -25.80        | -1       |
|      | 183        | 1.23±0.06 <sup>abc</sup>                   | -3.87         | 0        | 1.49±0.14 <sup>de</sup>              | -22.36        | -1       |
|      | 1830       | 0.97±0.04 <sup>e</sup>                     | -24.17        | -2       | 1.22±0.27 <sup>cde</sup>             | -36.38        | -2       |
| 2    | 0          | 1.28±0.03 <sup>a</sup>                     | 0.00          | 0        | 1.92±0.18 <sup>bc</sup>              | 0.00          | 0        |
|      | 0.183      | 1.33±0.03 <sup>a</sup>                     | 3.41          | 0        | 1.86±0.23 <sup>bcd</sup>             | -3.15         | 0        |
|      | 1.83       | 1.32±0.03 <sup>a</sup>                     | 2.66          | 0        | 0.47±0.09 <sup>a</sup>               | -75.40        | -3       |
|      | 18.3       | 1.26±0.07 <sup>a</sup>                     | -2.23         | 0        | 1.50±0.18 <sup>cde</sup>             | -21.94        | -1       |
|      | 183        | 1.28±0.07 <sup>a</sup>                     | -0.48         | 0        | 1.39±0.32 <sup>de</sup>              | -27.44        | -1       |
|      | 1830       | 0.87±0.03 <sup>b</sup>                     | -32.54        | -3       | 1.40±0.28 <sup>de</sup>              | -27.01        | -1       |
| 3    | 0          | 1.28±0.03 <sup>abc</sup>                   | 0.00          | 0        | 1.92±0.18 <sup>b</sup>               | 0.00          | 0        |
|      | 0.183      | 1.23±0.06 <sup>abd</sup>                   | -4.42         | 0        | 1.26±0.15 <sup>ce</sup>              | -34.41        | -1       |
|      | 1.83       | 1.33±0.03 <sup>ac</sup>                    | 3.46          | 0        | 0.73±0.07 <sup>ade</sup>             | -61.92        | -3       |
|      | 18.3       | 1.32±0.03 <sup>ac</sup>                    | 3.08          | 0        | 1.04±0.23 <sup>cde</sup>             | -45.97        | -3       |
|      | 183        | 1.28±0.05 <sup>abc</sup>                   | -0.03         | 0        | 1.17±0.28 <sup>ce</sup>              | -39.12        | -2       |
|      | 1830       | 1.02±0.01 <sup>e</sup>                     | -20.44        | -2       | 1.33±0.08 <sup>ce</sup>              | -30.69        | -2       |
| 4    | 0          | 1.28±0.03 <sup>abc</sup>                   | 0.00          | 0        | 1.92±0.18 <sup>bef</sup>             | 0.00          | 0        |
|      | 0.183      | 1.24±0.04 <sup>abcd</sup>                  | -3.32         | 0        | 1.25±0.43 <sup>cdef</sup>            | -34.95        | -2       |
|      | 1.83       | 1.22±0.01 <sup>abcdf</sup>                 | -4.74         | 0        | 1.17±0.17 <sup>cdf</sup>             | -38.77        | -2       |
|      | 18.3       | 1.19±0.04 <sup>bcd</sup>                   | -7.58         | 0        | 1.78±0.10 <sup>bcef</sup>            | -7.37         | 0        |
|      | 183        | 1.14±0.05 <sup>def</sup>                   | -11.37        | -1       | 1.44±0.15 <sup>bcd</sup>             | -25.03        | -1       |
|      | 1830       | 0.83±0.02 <sup>h</sup>                     | -35.10        | -3       | 1.32±0.28 <sup>cdef</sup>            | -31.11        | -2       |
| 5    | 0          | 1.28±0.03 <sup>abc</sup>                   | 0.00          | 0        | 1.92±0.18 <sup>bceh</sup>            | 0.00          | 0        |
|      | 0.183      | 1.24±0.02 <sup>ac</sup>                    | -3.14         | 0        | 1.92±0.26 <sup>bce</sup>             | 0.37          | 0        |
|      | 1.83       | 1.23±0.03 <sup>ac</sup>                    | -4.12         | 0        | 1.17±0.11 <sup>defl</sup>            | -39.15        | -2       |
|      | 18.3       | 1.14±0.01 <sup>df</sup>                    | -11.53        | -1       | 1.58±0.13 <sup>bcd</sup>             | -17.47        | 0        |
|      | 183        | 1.15±0.06 <sup>de</sup>                    | -10.43        | -1       | 1.36±0.24 <sup>bcd</sup>             | -28.79        | -1       |
|      | 1830       | 0.94±0.04 <sup>g</sup>                     | -26.65        | -2       | 1.14±0.25 <sup>df</sup>              | -40.52        | -3       |
| 6    | 0          | 1.28±0.03 <sup>a</sup>                     | 0.00          | 0        | 1.92±0.18 <sup>b</sup>               | 0.00          | 0        |
|      | 0.183      | 1.30±0.07 <sup>a</sup>                     | 1.21          | 0        | 2.30±0.62 <sup>b</sup>               | 19.90         | 0        |
|      | 1.83       | 1.25±0.05 <sup>a</sup>                     | -2.36         | 0        | 2.05±0.20 <sup>b</sup>               | 7.00          | 0        |
|      | 18.3       | 1.31±0.01 <sup>a</sup>                     | 2.38          | 0        | 1.12±0.21 <sup>c</sup>               | -41.44        | -3       |
|      | 183        | 1.16±0.03 <sup>b</sup>                     | -10.03        | -1       | 1.25±0.25 <sup>c</sup>               | -34.97        | -2       |
|      | 1830       | 0.85±0.03 <sup>d</sup>                     | -33.69        | -3       | 1.39±0.23 <sup>c</sup>               | -27.46        | -1       |

Percentage reduction respect to the negative control is calculated as (ZA-related compound data – control data) x 100 / control data. a) Percentage reduction of the maximum specific growth rate: code (0) x > -10 %; code (-1) -10 % ≤ x < -20 %; code (-2) -20 % ≤ x < -30 %; code (-3) x ≤ -30 %; b) Percentage reduction of the number of adhered cells: code (+1) x > +20 %; code (0) +20 % ≤ x < -20 %; code (-1) -20 % ≤ x < -30 %; code (-2) -30 % ≤ x < -40 %; code (-3) x ≤ -40 %. According to post hoc analysis (Tukey's HSD, p < 0.05), data sharing the same letter indicate no significant difference.

**S1B Table. Planktonic growth and cell adhesion in the presence of compounds 7-13.**

| Cmpd | Conc. ( $\mu\text{M}$ ) | Planktonic growth                         |               |          | Cell adhesion                      |               |          |
|------|-------------------------|-------------------------------------------|---------------|----------|------------------------------------|---------------|----------|
|      |                         | $A_{600}/\text{min}$ ( $\times 10^{-3}$ ) | Reduction (%) | Code (a) | N. adhered cells ( $\times 10^7$ ) | Reduction (%) | Code (b) |
| 7    | 0                       | 1.28 $\pm$ 0.03 <sup>a</sup>              | 0.00          | 0        | 1.92 $\pm$ 0.18 <sup>bc</sup>      | 0.00          | 0        |
|      | 0.183                   | 1.29 $\pm$ 0.03 <sup>a</sup>              | 0.12          | 0        | 1.73 $\pm$ 0.32 <sup>bcd</sup>     | -9.57         | 0        |
|      | 1.83                    | 1.26 $\pm$ 0.02 <sup>a</sup>              | -1.99         | 0        | 1.75 $\pm$ 0.37 <sup>bc</sup>      | -8.60         | 0        |
|      | 18.3                    | 1.31 $\pm$ 0.00 <sup>a</sup>              | 1.90          | 0        | 1.88 $\pm$ 0.41 <sup>bc</sup>      | -1.95         | 0        |
|      | 183                     | 1.28 $\pm$ 0.05 <sup>a</sup>              | -0.41         | 0        | 1.56 $\pm$ 0.20 <sup>bcd</sup>     | -18.67        | 0        |
|      | 1830                    | 0.96 $\pm$ 0.04 <sup>c</sup>              | -24.88        | -2       | 1.18 $\pm$ 0.23 <sup>cd</sup>      | -38.63        | -2       |
| 8    | 0                       | 1.28 $\pm$ 0.03 <sup>a</sup>              | 0.00          | 0        | 1.92 $\pm$ 0.18 <sup>b</sup>       | 0.00          | 0        |
|      | 0.183                   | 1.30 $\pm$ 0.04 <sup>a</sup>              | 1.13          | 0        | 1.63 $\pm$ 0.37 <sup>b</sup>       | -14.90        | 0        |
|      | 1.83                    | 1.26 $\pm$ 0.05 <sup>a</sup>              | -1.68         | 0        | 1.14 $\pm$ 0.19 <sup>c</sup>       | -40.28        | -3       |
|      | 18.3                    | 1.27 $\pm$ 0.03 <sup>a</sup>              | -1.14         | 0        | 1.06 $\pm$ 0.18 <sup>c</sup>       | -44.92        | -3       |
|      | 183                     | 1.28 $\pm$ 0.05 <sup>a</sup>              | -0.51         | 0        | 1.14 $\pm$ 0.11 <sup>c</sup>       | -40.73        | -3       |
|      | 1830                    | 1.11 $\pm$ 0.01 <sup>b</sup>              | -13.24        | -1       | 2.19 $\pm$ 0.28 <sup>d</sup>       | 14.29         | 0        |
| 9    | 0                       | 1.28 $\pm$ 0.03 <sup>a</sup>              | 0.00          | 0        | 1.92 $\pm$ 0.18 <sup>bc</sup>      | 0.00          | 0        |
|      | 0.183                   | 1.25 $\pm$ 0.04 <sup>a</sup>              | -2.79         | 0        | 1.75 $\pm$ 0.21 <sup>bcd</sup>     | -8.89         | 0        |
|      | 1.83                    | 1.27 $\pm$ 0.03 <sup>a</sup>              | -0.79         | 0        | 1.43 $\pm$ 0.25 <sup>cde</sup>     | -25.63        | -1       |
|      | 18.3                    | 1.30 $\pm$ 0.05 <sup>a</sup>              | 1.06          | 0        | 1.18 $\pm$ 0.31 <sup>de</sup>      | -38.64        | -2       |
|      | 183                     | 1.12 $\pm$ 0.00 <sup>b</sup>              | -12.86        | -1       | 1.40 $\pm$ 0.31 <sup>cde</sup>     | -27.19        | -1       |
|      | 1830                    | 0.83 $\pm$ 0.02 <sup>c</sup>              | -35.27        | -3       | 1.14 $\pm$ 0.22 <sup>de</sup>      | -40.36        | -3       |
| 10   | 0                       | 1.28 $\pm$ 0.03 <sup>a</sup>              | 0.00          | 0        | 1.92 $\pm$ 0.18 <sup>bc</sup>      | 0.00          | 0        |
|      | 0.183                   | 1.26 $\pm$ 0.04 <sup>a</sup>              | -1.86         | 0        | 1.81 $\pm$ 0.18 <sup>bcd</sup>     | -5.41         | 0        |
|      | 1.83                    | 1.24 $\pm$ 0.02 <sup>a</sup>              | -3.08         | 0        | 1.47 $\pm$ 0.17 <sup>cdef</sup>    | -23.51        | -1       |
|      | 18.3                    | 1.24 $\pm$ 0.02 <sup>a</sup>              | -3.14         | 0        | 1.19 $\pm$ 0.22 <sup>deg</sup>     | -37.94        | -2       |
|      | 183                     | 1.25 $\pm$ 0.06 <sup>a</sup>              | -2.43         | 0        | 1.57 $\pm$ 0.18 <sup>cdf</sup>     | -18.09        | 0        |
|      | 1830                    | 0.87 $\pm$ 0.02 <sup>d</sup>              | -32.40        | -3       | 1.10 $\pm$ 0.28 <sup>deg</sup>     | -42.38        | -3       |
| 11   | 0                       | 1.28 $\pm$ 0.03 <sup>abc</sup>            | 0.00          | 0        | 1.92 $\pm$ 0.18 <sup>b</sup>       | 0.00          | 0        |
|      | 0.183                   | 1.25 $\pm$ 0.04 <sup>abc</sup>            | -2.93         | 0        | 2.26 $\pm$ 0.16 <sup>c</sup>       | 18.06         | 0        |
|      | 1.83                    | 1.24 $\pm$ 0.02 <sup>abc</sup>            | -3.19         | 0        | 1.53 $\pm$ 0.17 <sup>d</sup>       | -20.05        | -1       |
|      | 18.3                    | 1.31 $\pm$ 0.01 <sup>ab</sup>             | 2.04          | 0        | 1.43 $\pm$ 0.28 <sup>d</sup>       | -25.44        | -1       |
|      | 183                     | 1.24 $\pm$ 0.04 <sup>ac</sup>             | -3.38         | 0        | 0.40 $\pm$ 0.06 <sup>a</sup>       | -79.23        | -3       |
|      | 1830                    | 0.87 $\pm$ 0.01 <sup>f</sup>              | -32.56        | -3       | 0.48 $\pm$ 0.03 <sup>a</sup>       | -74.86        | -3       |
| 12   | 0                       | 1.28 $\pm$ 0.03 <sup>ab</sup>             | 0.00          | 0        | 1.92 $\pm$ 0.18 <sup>bc</sup>      | 0.00          | 0        |
|      | 0.183                   | 1.34 $\pm$ 0.07 <sup>ab</sup>             | 4.38          | 0        | 1.82 $\pm$ 0.44 <sup>bcd</sup>     | -4.88         | 0        |
|      | 1.83                    | 1.29 $\pm$ 0.05 <sup>abc</sup>            | 0.19          | 0        | 1.82 $\pm$ 0.11 <sup>bcd</sup>     | -5.16         | 0        |
|      | 18.3                    | 1.22 $\pm$ 0.05 <sup>bc</sup>             | -4.95         | 0        | 1.63 $\pm$ 0.29 <sup>bcd</sup>     | -14.70        | 0        |
|      | 183                     | 1.21 $\pm$ 0.03 <sup>c</sup>              | -5.56         | 0        | 1.54 $\pm$ 0.30 <sup>cd</sup>      | -19.83        | 0        |
|      | 1830                    | 0.99 $\pm$ 0.03 <sup>d</sup>              | -23.12        | -2       | 1.30 $\pm$ 0.33 <sup>d</sup>       | -32.21        | -2       |
| 13   | 0                       | 1.28 $\pm$ 0.03 <sup>ac</sup>             | 0.00          | 0        | 1.92 $\pm$ 0.18 <sup>bc</sup>      | 0.00          | 0        |
|      | 0.183                   | 1.29 $\pm$ 0.02 <sup>ac</sup>             | 0.41          | 0        | 1.78 $\pm$ 0.05 <sup>bce</sup>     | -7.13         | 0        |
|      | 1.83                    | 1.22 $\pm$ 0.08 <sup>ab</sup>             | -4.66         | 0        | 1.75 $\pm$ 0.19 <sup>bce</sup>     | -8.79         | 0        |
|      | 18.3                    | 1.31 $\pm$ 0.02 <sup>ac</sup>             | 2.40          | 0        | 1.31 $\pm$ 0.24 <sup>cdef</sup>    | -31.41        | -2       |
|      | 183                     | 1.25 $\pm$ 0.03 <sup>abc</sup>            | -2.47         | 0        | 1.59 $\pm$ 0.18 <sup>de</sup>      | -17.14        | 0        |
|      | 1830                    | 1.00 $\pm$ 0.02 <sup>d</sup>              | -22.39        | -2       | 1.19 $\pm$ 0.24 <sup>df</sup>      | -37.93        | -2       |

Percentage reduction respect to the negative control is calculated as (ZA-related compound data – control data)  $\times$  100 / control data. a) Percentage reduction of the maximum specific growth rate: code (0)  $x > -10\%$ ; code (-1)  $-10\% \leq x < -20\%$ ; code (-2)  $-20\% \leq x < -30\%$ ; code (-3)  $x \leq -30\%$ ; b) Percentage reduction of the number of adhered cells: code (+1)  $x > +20\%$ ; code (0)  $+20\% \leq x < -20\%$ ; code (-1)  $-20\% \leq x < -30\%$ ; code (-2)  $-30\% \leq x < -40\%$ ; code (-3)  $x \leq -40\%$ . According to post hoc analysis (Tukey's HSD,  $p < 0.05$ ), data sharing the same letter indicate no significant difference.

**S1C Table. Planktonic growth and cell adhesion in the presence of compounds 14-20.**

| Cmpd | Conc. (μM) | Planktonic growth                         |               |          | Cell adhesion                      |               |          |
|------|------------|-------------------------------------------|---------------|----------|------------------------------------|---------------|----------|
|      |            | $A_{600}/\text{min}$ ( $\times 10^{-3}$ ) | Reduction (%) | Code (a) | N. adhered cells ( $\times 10^7$ ) | Reduction (%) | Code (b) |
| 14   | 0          | 1.28±0.03 <sup>abc</sup>                  | 0.00          | 0        | 1.92±0.18 <sup>bcef</sup>          | 0.00          | 0        |
|      | 0.183      | 1.21±0.02 <sup>abcde</sup>                | -5.68         | 0        | 1.93±0.06 <sup>bcefg</sup>         | 0.68          | 0        |
|      | 1.83       | 1.27±0.01 <sup>abc</sup>                  | -1.20         | 0        | 1.70±0.14 <sup>bcef</sup>          | -11.20        | 0        |
|      | 18.3       | 1.23±0.04 <sup>abcd</sup>                 | -3.89         | 0        | 1.33±0.21 <sup>abcef</sup>         | -30.56        | -2       |
|      | 183        | 1.30±0.02 <sup>abc</sup>                  | 1.57          | 0        | 2.29±0.50 <sup>bcef</sup>          | 19.62         | 0        |
|      | 1830       | 1.14±0.03 <sup>bde</sup>                  | -10.95        | -1       | 4.25±1.35 <sup>hi</sup>            | 121.57        | +        |
| 15   | 0          | 1.28±0.03 <sup>a</sup>                    | 0.00          | 0        | 1.92±0.18 <sup>bc</sup>            | 0.00          | 0        |
|      | 0.183      | 1.31±0.05 <sup>a</sup>                    | 1.90          | 0        | 1.76±0.08 <sup>bce</sup>           | -7.98         | 0        |
|      | 1.83       | 1.27±0.05 <sup>a</sup>                    | -1.23         | 0        | 1.72±0.18 <sup>bce</sup>           | -10.36        | 0        |
|      | 18.3       | 1.30±0.01 <sup>a</sup>                    | 1.46          | 0        | 1.41±0.14 <sup>de</sup>            | -26.16        | -1       |
|      | 183        | 1.29±0.03 <sup>a</sup>                    | 0.63          | 0        | 1.53±0.23 <sup>cde</sup>           | -19.96        | 0        |
|      | 1830       | 0.86±0.02 <sup>b</sup>                    | -32.67        | -3       | 1.58±0.26 <sup>cde</sup>           | -17.47        | 0        |
| 16   | 0          | 1.28±0.03 <sup>a</sup>                    | 0.00          | 0        | 1.92±0.18 <sup>bf</sup>            | 0.00          | 0        |
|      | 0.183      | 1.29±0.04 <sup>a</sup>                    | 0.21          | 0        | 3.59±0.37 <sup>c</sup>             | 87.42         | +        |
|      | 1.83       | 1.31±0.05 <sup>a</sup>                    | 2.05          | 0        | 1.46±0.19 <sup>def</sup>           | -23.68        | -1       |
|      | 18.3       | 1.28±0.04 <sup>a</sup>                    | -0.29         | 0        | 1.36±0.19 <sup>de</sup>            | -28.82        | -1       |
|      | 183        | 1.29±0.05 <sup>a</sup>                    | 0.13          | 0        | 1.74±0.11 <sup>bdf</sup>           | -8.95         | 0        |
|      | 1830       | 1.03±0.05 <sup>d</sup>                    | -20.16        | -2       | 1.33±0.17 <sup>de</sup>            | -30.57        | -2       |
| 17   | 0          | 1.28±0.03 <sup>abc</sup>                  | 0.00          | 0        | 1.92±0.18 <sup>bd</sup>            | 0.00          | 0        |
|      | 0.183      | 1.28±0.03 <sup>abcd</sup>                 | -0.29         | 0        | 3.62±0.37 <sup>c</sup>             | 88.79         | +        |
|      | 1.83       | 1.30±0.07 <sup>abcd</sup>                 | 0.87          | 0        | 1.76±0.08 <sup>bdf</sup>           | -8.09         | 0        |
|      | 18.3       | 1.33±0.04 <sup>ab</sup>                   | 3.62          | 0        | 1.37±0.14 <sup>ef</sup>            | -28.33        | -1       |
|      | 183        | 1.29±0.02 <sup>abc</sup>                  | 0.68          | 0        | 1.49±0.19 <sup>def</sup>           | -22.26        | -1       |
|      | 1830       | 1.05±0.04 <sup>ef</sup>                   | -17.95        | -1       | 1.08±0.15 <sup>h</sup>             | -43.68        | -3       |
| 18   | 0          | 1.28±0.03 <sup>ab</sup>                   | 0.00          | 0        | 1.92±0.18 <sup>bcd</sup>           | 0.00          | 0        |
|      | 0.183      | 1.28±0.02 <sup>ab</sup>                   | 0.07          | 0        | 2.16±0.15 <sup>bc</sup>            | 12.75         | 0        |
|      | 1.83       | 1.26±0.04 <sup>abc</sup>                  | -1.68         | 0        | 1.89±0.19 <sup>bcd</sup>           | -1.22         | 0        |
|      | 18.3       | 1.31±0.04 <sup>ab</sup>                   | 1.79          | 0        | 1.61±0.23 <sup>bd</sup>            | -16.05        | 0        |
|      | 183        | 1.20±0.03 <sup>bc</sup>                   | -6.82         | 0        | 1.95±0.25 <sup>bcd</sup>           | 1.50          | 0        |
|      | 1830       | 1.00±0.05 <sup>c</sup>                    | -22.04        | -2       | 2.79±0.46 <sup>e</sup>             | 45.65         | +        |
| 19   | 0          | 1.28±0.03 <sup>a</sup>                    | 0.00          | 0        | 1.92±0.18 <sup>bc</sup>            | 0.00          | 0        |
|      | 0.183      | 1.30±0.06 <sup>a</sup>                    | 0.88          | 0        | 1.93±0.44 <sup>bcd</sup>           | 0.81          | 0        |
|      | 1.83       | 1.29±0.05 <sup>a</sup>                    | 0.50          | 0        | 1.67±0.12 <sup>bcd</sup>           | -12.94        | 0        |
|      | 18.3       | 1.30±0.01 <sup>a</sup>                    | 1.58          | 0        | 1.65±0.19 <sup>cd</sup>            | -13.94        | 0        |
|      | 183        | 1.32±0.04 <sup>a</sup>                    | 2.69          | 0        | 1.80±0.28 <sup>bcd</sup>           | -6.18         | 0        |
|      | 1830       | 1.05±0.04 <sup>b</sup>                    | -18.13        | -1       | 1.61±0.14 <sup>cd</sup>            | -15.75        | 0        |
| 20   | 0          | 1.28±0.03 <sup>a</sup>                    | 0.00          | 0        | 1.92±0.18 <sup>bc</sup>            | 0.00          | 0        |
|      | 0.183      | 1.30±0.03 <sup>a</sup>                    | 1.40          | 0        | 1.91±0.33 <sup>bcd</sup>           | -0.13         | 0        |
|      | 1.83       | 1.31±0.03 <sup>a</sup>                    | 2.18          | 0        | 1.58±0.10 <sup>cde</sup>           | -17.44        | 0        |
|      | 18.3       | 1.30±0.04 <sup>a</sup>                    | 1.14          | 0        | 1.52±0.23 <sup>de</sup>            | -20.60        | -1       |
|      | 183        | 1.29±0.04 <sup>a</sup>                    | 0.12          | 0        | 0.60±0.04 <sup>a</sup>             | -68.90        | -3       |
|      | 1830       | 1.13±0.02 <sup>b</sup>                    | -11.61        | -1       | 0.72±0.13 <sup>a</sup>             | -62.34        | -3       |

Percentage reduction respect to the negative control is calculated as (ZA-related compound data – control data) x 100 / control data. a) Percentage reduction of the maximum specific growth rate: code (0)  $x > -10\%$ ; code (-1)  $-10\% \leq x < -20\%$ ; code (-2)  $-20\% \leq x < -30\%$ ; code (-3)  $x \leq -30\%$ ; b) Percentage reduction of the number of adhered cells: code (+1)  $x > +20\%$ ; code (0)  $+20\% \leq x < -20\%$ ; code (-1)  $-20\% \leq x < -30\%$ ; code (-2)  $-30\% \leq x < -40\%$ ; code (-3)  $x \leq -40\%$ . According to post hoc analysis (Tukey's HSD,  $p < 0.05$ ), data sharing the same letter indicate no significant difference.

**S1D Table. Planktonic growth and cell adhesion in the presence of compounds 21-27.**

| Cmpd | Conc. ( $\mu\text{M}$ ) | Planktonic growth                         |               |          | Cell adhesion                      |               |          |
|------|-------------------------|-------------------------------------------|---------------|----------|------------------------------------|---------------|----------|
|      |                         | $A_{600}/\text{min}$ ( $\times 10^{-3}$ ) | Reduction (%) | Code (a) | N. adhered cells ( $\times 10^7$ ) | Reduction (%) | Code (b) |
| 21   | 0                       | 1.28 $\pm$ 0.03 <sup>a</sup>              | 0.00          | 0        | 1.92 $\pm$ 0.18 <sup>bc</sup>      | 0.00          | 0        |
|      | 0.183                   | 1.32 $\pm$ 0.04 <sup>a</sup>              | 2.92          | 0        | 1.71 $\pm$ 0.16 <sup>bcd</sup>     | -10.57        | 0        |
|      | 1.83                    | 1.30 $\pm$ 0.01 <sup>a</sup>              | 0.95          | 0        | 1.60 $\pm$ 0.18 <sup>cde</sup>     | -16.42        | 0        |
|      | 18.3                    | 1.30 $\pm$ 0.05 <sup>a</sup>              | 1.62          | 0        | 1.72 $\pm$ 0.23 <sup>bcd</sup>     | -10.51        | 0        |
|      | 183                     | 1.32 $\pm$ 0.00 <sup>a</sup>              | 2.52          | 0        | 1.34 $\pm$ 0.18 <sup>def</sup>     | -30.22        | -2       |
|      | 1830                    | 1.03 $\pm$ 0.04 <sup>b</sup>              | -20.07        | -2       | 1.24 $\pm$ 0.16 <sup>def</sup>     | -35.24        | -2       |
| 22   | 0                       | 1.28 $\pm$ 0.03 <sup>acd</sup>            | 0.00          | 0        | 1.92 $\pm$ 0.18 <sup>b</sup>       | 0.00          | 0        |
|      | 0.183                   | 1.21 $\pm$ 0.01 <sup>bcd</sup>            | -5.58         | 0        | 3.07 $\pm$ 0.17 <sup>c</sup>       | 60.29         | +        |
|      | 1.83                    | 1.29 $\pm$ 0.03 <sup>acd</sup>            | 0.75          | 0        | 2.66 $\pm$ 0.23 <sup>ce</sup>      | 38.91         | +        |
|      | 18.3                    | 1.29 $\pm$ 0.02 <sup>acd</sup>            | 0.43          | 0        | 1.37 $\pm$ 0.06 <sup>deg</sup>     | -28.42        | -1       |
|      | 183                     | 1.24 $\pm$ 0.01 <sup>abcd</sup>           | -3.61         | 0        | 1.18 $\pm$ 0.33 <sup>df</sup>      | -38.53        | -2       |
|      | 1830                    | 1.17 $\pm$ 0.06 <sup>b</sup>              | -9.14         | 0        | 0.99 $\pm$ 0.04 <sup>degh</sup>    | -48.14        | -3       |
| 23   | 0                       | 1.28 $\pm$ 0.03 <sup>a</sup>              | 0.00          | 0        | 1.92 $\pm$ 0.18 <sup>b</sup>       | 0.00          | 0        |
|      | 0.183                   | 1.32 $\pm$ 0.02 <sup>a</sup>              | 2.93          | 0        | 2.26 $\pm$ 0.22 <sup>c</sup>       | 17.80         | 0        |
|      | 1.83                    | 1.29 $\pm$ 0.07 <sup>a</sup>              | 0.37          | 0        | 1.22 $\pm$ 0.15 <sup>d</sup>       | -36.25        | -2       |
|      | 18.3                    | 1.31 $\pm$ 0.06 <sup>a</sup>              | 2.26          | 0        | 1.50 $\pm$ 0.16 <sup>d</sup>       | -21.75        | -1       |
|      | 183                     | 1.12 $\pm$ 0.03 <sup>b</sup>              | -12.66        | -1       | 1.24 $\pm$ 0.15 <sup>d</sup>       | -35.24        | -2       |
|      | 1830                    | 0.56 $\pm$ 0.02 <sup>c</sup>              | -56.28        | -3       | 1.47 $\pm$ 0.23 <sup>d</sup>       | -23.17        | -1       |
| 24   | 0                       | 1.28 $\pm$ 0.03 <sup>a</sup>              | 0.00          | 0        | 1.92 $\pm$ 0.18 <sup>b</sup>       | 0.00          | 0        |
|      | 0.183                   | 1.26 $\pm$ 0.03 <sup>a</sup>              | -1.69         | 0        | 4.77 $\pm$ 0.47 <sup>c</sup>       | 148.78        | +        |
|      | 1.83                    | 1.29 $\pm$ 0.01 <sup>a</sup>              | 0.37          | 0        | 1.83 $\pm$ 0.22 <sup>b</sup>       | -4.76         | 0        |
|      | 18.3                    | 1.31 $\pm$ 0.01 <sup>a</sup>              | 2.32          | 0        | 1.96 $\pm$ 0.12 <sup>b</sup>       | 2.38          | 0        |
|      | 183                     | 1.15 $\pm$ 0.03 <sup>b</sup>              | -10.36        | -1       | 4.16 $\pm$ 0.54 <sup>c</sup>       | 117.10        | +        |
|      | 1830                    | 1.09 $\pm$ 0.01 <sup>b</sup>              | -15.26        | -1       | 9.52 $\pm$ 1.19 <sup>e</sup>       | 396.86        | +        |
| 25   | 0                       | 1.28 $\pm$ 0.03 <sup>a</sup>              | 0.00          | 0        | 1.92 $\pm$ 0.18 <sup>b</sup>       | 0.00          | 0        |
|      | 0.183                   | 1.27 $\pm$ 0.01 <sup>a</sup>              | -0.72         | 0        | 2.60 $\pm$ 0.15 <sup>c</sup>       | 35.59         | +        |
|      | 1.83                    | 1.29 $\pm$ 0.02 <sup>a</sup>              | 0.83          | 0        | 1.73 $\pm$ 0.16 <sup>b</sup>       | -9.71         | 0        |
|      | 18.3                    | 1.24 $\pm$ 0.05 <sup>a</sup>              | -3.48         | 0        | 1.67 $\pm$ 0.08 <sup>b</sup>       | -12.95        | 0        |
|      | 183                     | 1.12 $\pm$ 0.04 <sup>b</sup>              | -12.58        | -1       | 1.64 $\pm$ 0.24 <sup>b</sup>       | -14.33        | 0        |
|      | 1830                    | 0.55 $\pm$ 0.01 <sup>c</sup>              | -56.89        | -3       | 1.12 $\pm$ 0.15 <sup>d</sup>       | -41.78        | -3       |
| 26   | 0                       | 1.28 $\pm$ 0.03 <sup>ab</sup>             | 0.00          | 0        | 1.92 $\pm$ 0.18 <sup>bc</sup>      | 0.00          | 0        |
|      | 0.183                   | 1.31 $\pm$ 0.02 <sup>ab</sup>             | 2.18          | 0        | 1.63 $\pm$ 0.13 <sup>bcd</sup>     | -15.20        | 0        |
|      | 1.83                    | 1.27 $\pm$ 0.04 <sup>abc</sup>            | -1.37         | 0        | 1.58 $\pm$ 0.17 <sup>cd</sup>      | -17.76        | 0        |
|      | 18.3                    | 1.26 $\pm$ 0.06 <sup>abc</sup>            | -1.92         | 0        | 1.52 $\pm$ 0.25 <sup>cd</sup>      | -20.80        | -1       |
|      | 183                     | 1.25 $\pm$ 0.03 <sup>abc</sup>            | -2.92         | 0        | 1.47 $\pm$ 0.11 <sup>cd</sup>      | -23.44        | -1       |
|      | 1830                    | 0.81 $\pm$ 0.03 <sup>e</sup>              | -37.06        | -3       | 1.62 $\pm$ 0.20 <sup>cd</sup>      | -15.63        | 0        |
| 27   | 0                       | 1.28 $\pm$ 0.03 <sup>a</sup>              | 0.00          | 0        | 1.92 $\pm$ 0.18 <sup>bde</sup>     | 0.00          | 0        |
|      | 0.183                   | 1.28 $\pm$ 0.04 <sup>a</sup>              | -0.57         | 0        | 2.52 $\pm$ 0.45 <sup>c</sup>       | 31.74         | +        |
|      | 1.83                    | 1.29 $\pm$ 0.06 <sup>a</sup>              | 0.23          | 0        | 1.99 $\pm$ 0.23 <sup>bd</sup>      | 4.07          | 0        |
|      | 18.3                    | 1.29 $\pm$ 0.05 <sup>a</sup>              | 0.20          | 0        | 1.95 $\pm$ 0.11 <sup>bd</sup>      | 1.79          | 0        |
|      | 183                     | 1.29 $\pm$ 0.02 <sup>a</sup>              | 0.60          | 0        | 1.67 $\pm$ 0.18 <sup>be</sup>      | -12.90        | 0        |
|      | 1830                    | 1.15 $\pm$ 0.03 <sup>b</sup>              | -10.65        | -1       | 1.71 $\pm$ 0.16 <sup>be</sup>      | -10.97        | 0        |

Percentage reduction respect to the negative control is calculated as (ZA-related compound data – control data) x 100 / control data. a) Percentage reduction of the maximum specific growth rate: code (0)  $x > -10\%$ ; code (-1)  $-10\% \leq x < -20\%$ ; code (-2)  $-20\% \leq x < -30\%$ ; code (-3)  $x \leq -30\%$ ; b) Percentage reduction of the number of adhered cells: code (+1)  $x > +20\%$ ; code (0)  $+20\% \leq x < -20\%$ ; code (-1)  $-20\% \leq x < -30\%$ ; code (-2)  $-30\% \leq x < -40\%$ ; code (-3)  $x \leq -40\%$ . According to post hoc analysis (Tukey's HSD,  $p < 0.05$ ), data sharing the same letter indicate no significant difference.

**S1E Table. Planktonic growth and cell adhesion in the presence of compounds 28-34.**

| Cmpd | Conc. (μM) | Planktonic growth                         |               |          | Cell adhesion                      |               |          |
|------|------------|-------------------------------------------|---------------|----------|------------------------------------|---------------|----------|
|      |            | $A_{600}/\text{min}$ ( $\times 10^{-3}$ ) | Reduction (%) | Code (a) | N. adhered cells ( $\times 10^7$ ) | Reduction (%) | Code (b) |
| 28   | 0          | 1.28±0.03 <sup>a</sup>                    | 0.00          | 0        | 1.92±0.18 <sup>b</sup>             | 0.00          | 0        |
|      | 0.183      | 1.31±0.02 <sup>a</sup>                    | 1.67          | 0        | 1.94±0.01 <sup>b</sup>             | 1.10          | 0        |
|      | 1.83       | 1.28±0.02 <sup>a</sup>                    | -0.20         | 0        | 1.99±0.15 <sup>b</sup>             | 3.77          | 0        |
|      | 18.3       | 1.28±0.03 <sup>a</sup>                    | -0.61         | 0        | 1.76±0.10 <sup>b</sup>             | -8.15         | 0        |
|      | 183        | 1.28±0.05 <sup>a</sup>                    | 0.01          | 0        | 1.26±0.18 <sup>c</sup>             | -34.39        | -2       |
|      | 1830       | 0.86±0.02 <sup>c</sup>                    | -33.01        | -3       | 0.92±0.14 <sup>d</sup>             | -52.00        | -3       |
| 29   | 0          | 1.28±0.03 <sup>a</sup>                    | 0.00          | 0        | 1.92±0.18 <sup>bd</sup>            | 0.00          | 0        |
|      | 0.183      | 1.29±0.05 <sup>a</sup>                    | 0.29          | 0        | 2.56±0.26 <sup>c</sup>             | 33.75         | 1        |
|      | 1.83       | 1.29±0.04 <sup>a</sup>                    | 0.23          | 0        | 1.79±0.11 <sup>bd</sup>            | -6.83         | 0        |
|      | 18.3       | 1.31±0.06 <sup>a</sup>                    | 1.72          | 0        | 1.93±0.24 <sup>bd</sup>            | 0.73          | 0        |
|      | 183        | 1.28±0.05 <sup>a</sup>                    | -0.43         | 0        | 2.14±0.15 <sup>bcd</sup>           | 11.51         | 0        |
|      | 1830       | 0.76±0.02 <sup>b</sup>                    | -40.52        | -3       | 1.42±0.27 <sup>d</sup>             | -25.78        | -1       |
| 30   | 0          | 1.28±0.03 <sup>a</sup>                    | 0.00          | 0        | 1.92±0.18 <sup>be</sup>            | 0.00          | 0        |
|      | 0.183      | 1.23±0.01 <sup>a</sup>                    | -3.95         | 0        | 2.38±0.21 <sup>ce</sup>            | 24.26         | 1        |
|      | 1.83       | 1.29±0.02 <sup>a</sup>                    | 0.31          | 0        | 1.82±0.18 <sup>be</sup>            | -5.29         | 0        |
|      | 18.3       | 1.32±0.03 <sup>a</sup>                    | 2.86          | 0        | 1.97±0.19 <sup>be</sup>            | 2.99          | 0        |
|      | 183        | 1.26±0.05 <sup>a</sup>                    | -2.10         | 0        | 2.06±0.22 <sup>bce</sup>           | 7.33          | 0        |
|      | 1830       | 0.83±0.03 <sup>b</sup>                    | -35.51        | -3       | 1.40±0.16 <sup>f</sup>             | -26.98        | -1       |
| 31   | 0          | 1.28±0.03 <sup>a</sup>                    | 0.00          | 0        | 1.92±0.18 <sup>b</sup>             | 0.00          | 0        |
|      | 0.183      | 1.23±0.03 <sup>a</sup>                    | -3.94         | 0        | 2.85±0.43 <sup>c</sup>             | 48.69         | 1        |
|      | 1.83       | 1.26±0.00 <sup>a</sup>                    | -2.14         | 0        | 1.58±0.29 <sup>b</sup>             | -17.68        | 0        |
|      | 18.3       | 1.29±0.01 <sup>a</sup>                    | 0.61          | 0        | 1.99±0.43 <sup>b</sup>             | 4.02          | 0        |
|      | 183        | 1.24±0.04 <sup>a</sup>                    | -3.25         | 0        | 1.85±0.22 <sup>b</sup>             | -3.23         | 0        |
|      | 1830       | 0.82±0.02 <sup>d</sup>                    | -36.19        | -3       | 0.94±0.19 <sup>e</sup>             | -50.79        | -3       |
| 32   | 0          | 1.28±0.03 <sup>a</sup>                    | 0.00          | 0        | 1.92±0.18 <sup>bc</sup>            | 0.00          | 0        |
|      | 0.183      | 1.29±0.07 <sup>a</sup>                    | 0.30          | 0        | 1.39±0.15 <sup>abc</sup>           | -27.34        | -1       |
|      | 1.83       | 1.27±0.05 <sup>a</sup>                    | -0.88         | 0        | 1.64±0.11 <sup>bc</sup>            | -14.39        | 0        |
|      | 18.3       | 1.27±0.04 <sup>a</sup>                    | -1.26         | 0        | 1.83±0.14 <sup>bc</sup>            | -4.30         | 0        |
|      | 183        | 1.28±0.06 <sup>a</sup>                    | -0.16         | 0        | 1.62±0.19 <sup>bc</sup>            | -15.26        | 0        |
|      | 1830       | 1.25±0.02 <sup>a</sup>                    | -2.25         | 0        | 5.45±1.00 <sup>e</sup>             | 184.36        | 1        |
| 33   | 0          | 1.28±0.03 <sup>a</sup>                    | 0.00          | 0        | 1.92±0.18 <sup>b</sup>             | 0.00          | 0        |
|      | 0.183      | 1.25±0.06 <sup>a</sup>                    | -2.75         | 0        | 3.90±0.27 <sup>c</sup>             | 103.54        | 1        |
|      | 1.83       | 1.26±0.03 <sup>a</sup>                    | -1.49         | 0        | 1.88±0.09 <sup>b</sup>             | -1.99         | 0        |
|      | 18.3       | 1.32±0.02 <sup>a</sup>                    | 2.61          | 0        | 1.45±0.19 <sup>d</sup>             | -24.08        | -1       |
|      | 183        | 1.13±0.03 <sup>b</sup>                    | -12.31        | -1       | 1.31±0.24 <sup>d</sup>             | -31.43        | -2       |
|      | 1830       | 0.74±0.02 <sup>de</sup>                   | -42.25        | -3       | 1.51±0.16 <sup>d</sup>             | -21.25        | -1       |
| 34   | 0          | 1.28±0.03 <sup>a</sup>                    | 0.00          | 0        | 1.92±0.18 <sup>b</sup>             | 0.00          | 0        |
|      | 0.183      | 1.26±0.03 <sup>a</sup>                    | -2.19         | 0        | 5.75±0.32 <sup>e</sup>             | 199.95        | 1        |
|      | 1.83       | 1.28±0.05 <sup>a</sup>                    | 0.08          | 0        | 1.93±0.16 <sup>bc</sup>            | 0.83          | 0        |
|      | 18.3       | 1.29±0.04 <sup>a</sup>                    | 0.64          | 0        | 1.14±0.09 <sup>bc</sup>            | -40.43        | -3       |
|      | 183        | 1.10±0.02 <sup>b</sup>                    | -14.41        | -1       | 3.02±0.12 <sup>d</sup>             | 57.49         | 1        |
|      | 1830       | 1.00±0.04 <sup>c</sup>                    | -22.27        | -2       | 2.64±0.31 <sup>d</sup>             | 37.76         | 1        |

Percentage reduction respect to the negative control is calculated as (ZA-related compound data – control data) x 100 / control data. a) Percentage reduction of the maximum specific growth rate: code (0)  $x > -10\%$ ; code (-1)  $-10\% \leq x < -20\%$ ; code (-2)  $-20\% \leq x < -30\%$ ; code (-3)  $x \leq -30\%$ ; b) Percentage reduction of the number of adhered cells: code (+1)  $x > +20\%$ ; code (0)  $+20\% \leq x < -20\%$ ; code (-1)  $-20\% \leq x < -30\%$ ; code (-2)  $-30\% \leq x < -40\%$ ; code (-3)  $x \leq -40\%$ . According to post hoc analysis (Tukey's HSD,  $p < 0.05$ ), data sharing the same letter indicate no significant difference.

**S1F Table. Planktonic growth and cell adhesion in the presence of compounds 35-41.**

| Cmpd | Conc. ( $\mu\text{M}$ ) | Planktonic growth                         |               |          | Cell adhesion                      |               |          |
|------|-------------------------|-------------------------------------------|---------------|----------|------------------------------------|---------------|----------|
|      |                         | $A_{600}/\text{min}$ ( $\times 10^{-3}$ ) | Reduction (%) | Code (a) | N. adhered cells ( $\times 10^7$ ) | Reduction (%) | Code (b) |
| 35   | 0                       | 1.28 $\pm$ 0.03 <sup>a</sup>              | 0.00          | 0        | 1.92 $\pm$ 0.18 <sup>bcd</sup>     | 0.00          | 0        |
|      | 0.183                   | 1.26 $\pm$ 0.05 <sup>a</sup>              | -2.19         | 0        | 2.87 $\pm$ 0.56 <sup>bc</sup>      | 49.69         | 1        |
|      | 1.83                    | 1.25 $\pm$ 0.07 <sup>a</sup>              | -2.61         | 0        | 1.72 $\pm$ 0.19 <sup>bd</sup>      | -10.13        | 0        |
|      | 18.3                    | 1.16 $\pm$ 0.03 <sup>b</sup>              | -9.96         | 0        | 1.12 $\pm$ 0.14 <sup>c</sup>       | -41.80        | -3       |
|      | 183                     | 0.92 $\pm$ 0.05 <sup>c</sup>              | -28.33        | -2       | 2.85 $\pm$ 0.31 <sup>f</sup>       | 48.83         | 1        |
|      | 1830                    | 0.55 $\pm$ 0.02 <sup>d</sup>              | -56.93        | -3       | 5.72 $\pm$ 0.25 <sup>h</sup>       | 198.51        | 1        |
| 36   | 0                       | 1.28 $\pm$ 0.03 <sup>ab</sup>             | 0.00          | 0        | 1.92 $\pm$ 0.18 <sup>bdf</sup>     | 0.00          | 0        |
|      | 0.183                   | 1.23 $\pm$ 0.02 <sup>abc</sup>            | -4.03         | 0        | 2.87 $\pm$ 0.56 <sup>c</sup>       | 49.69         | 1        |
|      | 1.83                    | 1.24 $\pm$ 0.02 <sup>abc</sup>            | -3.79         | 0        | 1.78 $\pm$ 0.24 <sup>bd</sup>      | -7.38         | 0        |
|      | 18.3                    | 1.21 $\pm$ 0.03 <sup>bcd</sup>            | -5.71         | 0        | 1.13 $\pm$ 0.17 <sup>e</sup>       | -40.87        | -3       |
|      | 183                     | 1.15 $\pm$ 0.04 <sup>cd</sup>             | -10.75        | -1       | 2.27 $\pm$ 0.17 <sup>bf</sup>      | 18.70         | 0        |
|      | 1830                    | 1.08 $\pm$ 0.02 <sup>d</sup>              | -15.57        | -1       | 5.60 $\pm$ 0.65 <sup>h</sup>       | 192.07        | 1        |
| 37   | 0                       | 1.28 $\pm$ 0.03 <sup>ab</sup>             | 0.00          | 0        | 1.92 $\pm$ 0.18 <sup>b</sup>       | 0.00          | 0        |
|      | 0.183                   | 1.32 $\pm$ 0.04 <sup>ab</sup>             | 2.71          | 0        | 2.46 $\pm$ 0.17 <sup>b</sup>       | 28.52         | 1        |
|      | 1.83                    | 1.28 $\pm$ 0.07 <sup>ab</sup>             | -0.56         | 0        | 2.36 $\pm$ 0.26 <sup>b</sup>       | 23.00         | 1        |
|      | 18.3                    | 1.30 $\pm$ 0.03 <sup>ab</sup>             | 1.27          | 0        | 1.35 $\pm$ 0.28 <sup>b</sup>       | -29.61        | -1       |
|      | 183                     | 1.24 $\pm$ 0.05 <sup>a</sup>              | -3.17         | 0        | 5.08 $\pm$ 0.53 <sup>c</sup>       | 164.82        | 1        |
|      | 1830                    | 0.88 $\pm$ 0.02 <sup>c</sup>              | -31.64        | -3       | 5.43 $\pm$ 0.76 <sup>c</sup>       | 183.29        | 1        |
| 38   | 0                       | 1.28 $\pm$ 0.03 <sup>a</sup>              | 0.00          | 0        | 1.92 $\pm$ 0.18 <sup>bd</sup>      | 0.00          | 0        |
|      | 0.183                   | 1.31 $\pm$ 0.13 <sup>a</sup>              | 2.28          | 0        | 3.79 $\pm$ 0.61 <sup>c</sup>       | 98.02         | 1        |
|      | 1.83                    | 1.31 $\pm$ 0.01 <sup>a</sup>              | 1.66          | 0        | 3.69 $\pm$ 0.41 <sup>c</sup>       | 92.49         | 1        |
|      | 18.3                    | 1.31 $\pm$ 0.03 <sup>a</sup>              | 2.24          | 0        | 3.54 $\pm$ 0.20 <sup>c</sup>       | 84.50         | 1        |
|      | 183                     | 1.24 $\pm$ 0.03 <sup>a</sup>              | -3.39         | 0        | 2.11 $\pm$ 0.14 <sup>bd</sup>      | 9.90          | 0        |
|      | 1830                    | 1.22 $\pm$ 0.03 <sup>a</sup>              | -4.98         | 0        | 4.30 $\pm$ 1.01 <sup>c</sup>       | 124.16        | 1        |
| 39   | 0                       | 1.28 $\pm$ 0.03 <sup>a</sup>              | 0.00          | 0        | 1.92 $\pm$ 0.18 <sup>b</sup>       | 0.00          | 0        |
|      | 0.183                   | 1.29 $\pm$ 0.03 <sup>a</sup>              | 0.31          | 0        | 1.86 $\pm$ 0.35 <sup>b</sup>       | -3.07         | 0        |
|      | 1.83                    | 1.27 $\pm$ 0.04 <sup>a</sup>              | -0.89         | 0        | 1.94 $\pm$ 0.34 <sup>b</sup>       | 1.04          | 0        |
|      | 18.3                    | 1.26 $\pm$ 0.06 <sup>a</sup>              | -2.16         | 0        | 1.98 $\pm$ 0.24 <sup>b</sup>       | 3.58          | 0        |
|      | 183                     | 1.27 $\pm$ 0.02 <sup>a</sup>              | -1.39         | 0        | 2.10 $\pm$ 0.50 <sup>b</sup>       | 9.41          | 0        |
|      | 1830                    | 0.95 $\pm$ 0.05 <sup>b</sup>              | -25.66        | -2       | 1.83 $\pm$ 0.19 <sup>b</sup>       | -4.37         | 0        |
| 40   | 0                       | 1.28 $\pm$ 0.03 <sup>a</sup>              | 0.00          | 0        | 1.92 $\pm$ 0.18 <sup>bd</sup>      | 0.00          | 0        |
|      | 0.183                   | 1.26 $\pm$ 0.04 <sup>a</sup>              | -2.04         | 0        | 3.21 $\pm$ 0.39 <sup>cd</sup>      | 67.46         | 1        |
|      | 1.83                    | 1.24 $\pm$ 0.03 <sup>a</sup>              | -3.05         | 0        | 1.90 $\pm$ 0.20 <sup>bcd</sup>     | -0.85         | 0        |
|      | 18.3                    | 1.29 $\pm$ 0.05 <sup>a</sup>              | 0.56          | 0        | 1.92 $\pm$ 0.16 <sup>bcd</sup>     | 0.24          | 0        |
|      | 183                     | 1.31 $\pm$ 0.03 <sup>a</sup>              | 2.23          | 0        | 1.93 $\pm$ 0.28 <sup>bcd</sup>     | 0.60          | 0        |
|      | 1830                    | 0.82 $\pm$ 0.03 <sup>b</sup>              | -36.31        | -3       | 1.39 $\pm$ 0.24 <sup>bd</sup>      | -27.57        | -1       |
| 41   | 0                       | 1.28 $\pm$ 0.03 <sup>ac</sup>             | 0.00          | 0        | 1.92 $\pm$ 0.18 <sup>b</sup>       | 0.00          | 0        |
|      | 0.183                   | 1.27 $\pm$ 0.04 <sup>abc</sup>            | -0.89         | 0        | 2.09 $\pm$ 0.40 <sup>b</sup>       | 9.15          | 0        |
|      | 1.83                    | 1.24 $\pm$ 0.04 <sup>ab</sup>             | -3.19         | 0        | 1.63 $\pm$ 0.21 <sup>d</sup>       | -15.16        | 0        |
|      | 18.3                    | 1.24 $\pm$ 0.03 <sup>ab</sup>             | -3.45         | 0        | 1.87 $\pm$ 0.20 <sup>bd</sup>      | -2.50         | 0        |
|      | 183                     | 1.33 $\pm$ 0.03 <sup>ac</sup>             | 3.88          | 0        | 1.13 $\pm$ 0.38 <sup>ae</sup>      | -41.15        | -3       |
|      | 1830                    | 1.16 $\pm$ 0.03 <sup>d</sup>              | -9.88         | 0        | 0.70 $\pm$ 0.08 <sup>ae</sup>      | -63.30        | -3       |

Percentage reduction respect to the negative control is calculated as (ZA-related compound data – control data) x 100 / control data. a) Percentage reduction of the maximum specific growth rate: code (0)  $x > -10\%$ ; code (-1)  $-10\% \leq x < -20\%$ ; code (-2)  $-20\% \leq x < -30\%$ ; code (-3)  $x \leq -30\%$ ; b) Percentage reduction of the number of adhered cells: code (+1)  $x > +20\%$ ; code (0)  $+20\% \leq x < -20\%$ ; code (-1)  $-20\% \leq x < -30\%$ ; code (-2)  $-30\% \leq x < -40\%$ ; code (-3)  $x \leq -40\%$ . According to post hoc analysis (Tukey's HSD,  $p < 0.05$ ), data sharing the same letter indicate no significant difference.

**S1G Table. Planktonic growth and cell adhesion in the presence of compounds 42-43.**

| Cmpd | Conc. ( $\mu\text{M}$ ) | Planktonic growth                         |               |          | Cell adhesion                      |               |          |
|------|-------------------------|-------------------------------------------|---------------|----------|------------------------------------|---------------|----------|
|      |                         | $A_{600}/\text{min}$ ( $\times 10^{-3}$ ) | Reduction (%) | Code (a) | N. adhered cells ( $\times 10^7$ ) | Reduction (%) | Code (b) |
| 42   | 0                       | 1.28 $\pm$ 0.03 <sup>ab</sup>             | 0.00          | 0        | 1.92 $\pm$ 0.18 <sup>b</sup>       | 0.00          | 0        |
|      | 0.183                   | 1.29 $\pm$ 0.01 <sup>abc</sup>            | 0.16          | 0        | 3.30 $\pm$ 0.53 <sup>c</sup>       | 72.26         | 1        |
|      | 1.83                    | 1.31 $\pm$ 0.05 <sup>abc</sup>            | 1.96          | 0        | 1.84 $\pm$ 0.15 <sup>b</sup>       | -3.76         | 0        |
|      | 18.3                    | 1.33 $\pm$ 0.01 <sup>bc</sup>             | 3.53          | 0        | 1.78 $\pm$ 0.18 <sup>b</sup>       | -7.28         | 0        |
|      | 183                     | 1.30 $\pm$ 0.01 <sup>abc</sup>            | 1.04          | 0        | 1.68 $\pm$ 0.29 <sup>b</sup>       | -12.13        | 0        |
|      | 1830                    | 1.03 $\pm$ 0.02 <sup>d</sup>              | -19.39        | -1       | 2.23 $\pm$ 0.38 <sup>d</sup>       | 16.50         | 0        |
| 43   | 0                       | 1.28 $\pm$ 0.03 <sup>a</sup>              | 0.00          | 0        | 1.92 $\pm$ 0.18 <sup>bd</sup>      | 0.00          | 0        |
|      | 0.183                   | 1.28 $\pm$ 0.04 <sup>a</sup>              | -0.38         | 0        | 2.67 $\pm$ 0.45 <sup>cd</sup>      | 39.31         | 1        |
|      | 1.83                    | 1.29 $\pm$ 0.05 <sup>a</sup>              | 0.55          | 0        | 2.00 $\pm$ 0.28 <sup>bcd</sup>     | 4.48          | 0        |
|      | 18.3                    | 1.30 $\pm$ 0.02 <sup>a</sup>              | 1.61          | 0        | 1.99 $\pm$ 0.33 <sup>bd</sup>      | 4.03          | 0        |
|      | 183                     | 1.27 $\pm$ 0.03 <sup>a</sup>              | -1.19         | 0        | 1.95 $\pm$ 0.34 <sup>bcd</sup>     | 1.86          | 0        |
|      | 1830                    | 1.03 $\pm$ 0.04 <sup>b</sup>              | -19.67        | -1       | 1.66 $\pm$ 0.33 <sup>bd</sup>      | -13.31        | 0        |

Percentage reduction respect to the negative control is calculated as (ZA-related compound data – control data)  $\times$  100 / control data. a) Percentage reduction of the maximum specific growth rate: code (0)  $x > -10$  %; code (-1)  $-10$  %  $\leq x < -20$  %; code (-2)  $-20$  %  $\leq x < -30$  %; code (-3)  $x \leq -30$  %; b) Percentage reduction of the number of adhered cells: code (+1)  $x > +20$  %; code (0)  $+20$  %  $\leq x < -20$  %; code (-1)  $-20$  %  $\leq x < -30$  %; code (-2)  $-30$  %  $\leq x < -40$  %; code (-3)  $x \leq -40$  %. According to post hoc analysis (Tukey's HSD,  $p < 0.05$ ), data sharing the same letter indicate no significant difference.
