# Supplementary material for: Unravelling the Structural and Molecular Basis Responsible for the Anti-Biofilm Activity of Zosteric Acid
Source: PubMed Central journal article supplement (PMC4488431; doi:10.1371/journal.pone.0131519), 2015-07-01
Supplement: pone.0131519.s003.pdf [file pone.0131519.s003.pdf]

**S2 Table. Mass spectrometry peptide sequencing.**

| Accession <sup>a</sup> |                               |                                 |                               |                                                       |                              |                    |                                      |                     |                       |                       |                       |                                 |       |
|------------------------|-------------------------------|---------------------------------|-------------------------------|-------------------------------------------------------|------------------------------|--------------------|--------------------------------------|---------------------|-----------------------|-----------------------|-----------------------|---------------------------------|-------|
| POA8G6                 |                               |                                 |                               |                                                       |                              |                    |                                      |                     |                       |                       |                       |                                 |       |
| Source <sup>b</sup>    | Comp <sup>c</sup>             | Peptide confidence <sup>d</sup> | Sequence <sup>e</sup>         | Modifications <sup>f</sup>                            | # PSMs <sup>g</sup>          | Xcorr <sup>h</sup> | [M+H] <sup>+</sup> (Da) <sup>i</sup> | Charge <sup>j</sup> | m/z (Da) <sup>k</sup> | AM (ppm) <sup>l</sup> | RT (min) <sup>m</sup> | # Missed Cleavages <sup>n</sup> |       |
| SDS-PAGE               | CA                            | High                            | TFLDQTGGLWASGALY GK           |                                                       | 6                            | 3.66               | 1884.950                             | 3                   | 628.988               | 0.62                  | 29.76                 | 0                               |       |
|                        |                               | High                            | AVAEGASKVDGAEVVVK             |                                                       | 6                            | 3.35               | 1628.884                             | 3                   | 543.633               | -0.98                 | 16.94                 | 1                               |       |
|                        |                               | High                            | GGTPYGATTIAGGDGSR             |                                                       | 18                           | 3.13               | 1537.722                             | 2                   | 769.365               | -1.37                 | 16.78                 | 0                               |       |
|                        |                               | High                            | VLVLYYSmYGHIEtmAR             | M8(Oxidation); M15(Oxidation)                         | 3                            | 3.13               | 2078.008                             | 3                   | 693.341               | -0.34                 | 24.74                 | 0                               |       |
|                        |                               | High                            | TQTAPVATPQELADYDAIIFGTPTR     |                                                       | 7                            | 3.11               | 2676.352                             | 2                   | 1338.679              | -0.02                 | 30.55                 | 0                               |       |
|                        |                               | High                            | RVPETmPPQLFEK                 | M6(Oxidation)                                         | 9                            | 2.86               | 1587.820                             | 2                   | 794.414               | -0.10                 | 20.87                 | 1                               |       |
|                        |                               | High                            | YQGEYVAGLAVK                  |                                                       | 9                            | 2.83               | 1297.678                             | 2                   | 649.342               | -0.82                 | 21.19                 | 0                               |       |
|                        |                               | High                            | VPETmPPQLFEK                  | M5(Oxidation)                                         | 6                            | 2.42               | 1431.718                             | 2                   | 716.363               | -0.33                 | 21.46                 | 0                               |       |
|                        |                               | High                            | VDGAEVVVK                     |                                                       | 8                            | 2.35               | 915.514                              | 2                   | 458.261               | -0.86                 | 15.29                 | 0                               |       |
|                        |                               | High                            | FGNmSGQmR                     | M4(Oxidation); M8(Oxidation)                          | 11                           | 2.32               | 1059.433                             | 2                   | 530.220               | -1.34                 | 6.60                  | 0                               |       |
| Medium                 |                               | QPSQEELSIAR                     |                               | 2                                                     | 1.64                         | 1257.642           | 2                                    | 629.324             | -1.40                 | 17.69                 | 0                     |                                 |       |
| SDS-PAGE               | ZA                            | High                            | TQTAPVATPQELADYDAIIFGTPTR     |                                                       | 8                            | 5.71               | 2676.359                             | 2                   | 1338.683              | 2.81                  | 35.77                 | 0                               |       |
|                        |                               | High                            | AVAEGASKVDGAEVVVK             |                                                       | 8                            | 5.24               | 1628.886                             | 2                   | 814.946               | 0.11                  | 22.44                 | 1                               |       |
|                        |                               | High                            | GGTPYGATTIAGGDGSR             |                                                       | 10                           | 4.45               | 1537.724                             | 2                   | 769.366               | -0.18                 | 22.45                 | 0                               |       |
|                        |                               | High                            | RVPETMPPQLFEK                 |                                                       | 9                            | 4.19               | 1571.827                             | 2                   | 786.417               | 1.09                  | 27.94                 | 1                               |       |
|                        |                               | High                            | TFLDQTGGLWASGALY GK           |                                                       | 2                            | 4.05               | 1884.949                             | 2                   | 942.978               | 0.08                  | 34.59                 | 0                               |       |
|                        |                               | High                            | AGGKTQTAPVATPQELADYDAIIFGTPTR |                                                       | 2                            | 3.75               | 2989.541                             | 3                   | 997.185               | 4.66                  | 34.49                 | 1                               |       |
|                        |                               | High                            | YQGEYVAGLAVK                  |                                                       | 3                            | 3.47               | 1297.681                             | 2                   | 649.344               | 1.91                  | 26.35                 | 0                               |       |
|                        |                               | High                            | GGTPYGATTIAGGDGSRQPSQEELSIAR  |                                                       | 5                            | 3.35               | 2776.354                             | 2                   | 1388.680              | 1.37                  | 26.33                 | 1                               |       |
|                        |                               | High                            | RVPETmPPQLFEK                 | M6(Oxidation)                                         | 13                           | 3.27               | 1587.823                             | 2                   | 794.415               | 1.90                  | 25.94                 | 1                               |       |
|                        |                               | High                            | VPETmPPQLFEK                  | M5(Oxidation)                                         | 3                            | 3.19               | 1431.721                             | 2                   | 716.364               | 1.46                  | 26.77                 | 0                               |       |
|                        |                               | High                            | VDGAEVVVKR                    |                                                       | 1                            | 3.09               | 1071.617                             | 2                   | 536.312               | 1.27                  | 19.70                 | 1                               |       |
|                        |                               | High                            | VDGAEVVVK                     |                                                       | 5                            | 3.00               | 915.517                              | 2                   | 458.262               | 2.60                  | 20.69                 | 0                               |       |
|                        |                               | High                            | FGNMSGQMR                     |                                                       | 3                            | 2.98               | 1027.446                             | 2                   | 514.227               | 1.20                  | 21.64                 | 0                               |       |
|                        |                               | High                            | VPETMPPQLFEK                  |                                                       | 8                            | 2.82               | 1415.725                             | 2                   | 708.366               | 0.99                  | 29.84                 | 0                               |       |
|                        |                               | High                            | FGNMSGQmR                     | M8(Oxidation)                                         | 7                            | 2.80               | 1043.441                             | 2                   | 522.224               | 0.91                  | 18.11                 | 0                               |       |
|                        |                               | High                            | YQGEYVAGLAVKLNK               |                                                       | 1                            | 2.39               | 1581.829                             | 2                   | 791.418               | 1.01                  | 29.74                 | 1                               |       |
|                        |                               | High                            | QPSQEELSIAR                   |                                                       | 3                            | 2.21               | 1257.643                             | 2                   | 629.325               | -0.04                 | 22.75                 | 0                               |       |
|                        |                               | Medium                          |                               | FGNmSGQmR                                             | M4(Oxidation); M8(Oxidation) | 1                  | 1.97                                 | 1059.436            | 2                     | 530.222               | 1.54                  | 7.38                            | 0     |
|                        |                               | Medium                          |                               | LASVFSSTGTGGGQEQTITSTWTTLAHHG<br>MVIVPIGYAAQELFDVSQVR |                              | 1                  | 1.70                                 | 5148.595            | 3                     | 1716.870              | 4.14                  | 43.67                           | 0     |
|                        |                               | 2D-PAGE <sup>o</sup>            | ZA                            | High                                                  | TQTAPVATPQELADYDAIIFGTPTR    |                    | 1                                    | 5.30                | 2676.357              | 2                     | 1338.682              | 1.99                            | 35.80 |
| High                   | AVAEGASKVDGAEVVVK             |                                 |                               |                                                       | 8                            | 5.12               | 1628.888                             | 2                   | 814.948               | 1.61                  | 22.45                 | 1                               |       |
| High                   | RVPETMPPQLFEK                 |                                 |                               |                                                       | 7                            | 4.12               | 1571.828                             | 2                   | 786.417               | 1.64                  | 27.98                 | 1                               |       |
| High                   | GGTPYGATTIAGGDGSR             |                                 |                               |                                                       | 8                            | 3.93               | 1537.727                             | 2                   | 769.367               | 1.80                  | 22.16                 | 0                               |       |
| High                   | AGGKTQTAPVATPQELADYDAIIFGTPTR |                                 |                               |                                                       | 2                            | 3.76               | 2989.530                             | 3                   | 997.181               | 0.99                  | 34.50                 | 1                               |       |
| High                   | YQGEYVAGLAVKLNK               |                                 |                               |                                                       | 1                            | 3.61               | 1581.830                             | 2                   | 791.418               | 1.55                  | 29.71                 | 1                               |       |
| High                   | YQGEYVAGLAVK                  |                                 |                               |                                                       | 3                            | 3.51               | 1297.681                             | 2                   | 649.344               | 1.44                  | 26.35                 | 0                               |       |
| High                   | VPETmPPQLFEK                  |                                 |                               | M5(Oxidation)                                         | 2                            | 3.23               | 1431.721                             | 2                   | 716.364               | 1.54                  | 26.78                 | 0                               |       |
| High                   | FGNMSGQMR                     |                                 |                               |                                                       | 4                            | 3.05               | 1027.446                             | 2                   | 514.227               | 0.96                  | 21.66                 | 0                               |       |
| High                   | VDGAEVVVKR                    |                                 |                               |                                                       | 1                            | 2.91               | 1071.619                             | 2                   | 536.313               | 3.09                  | 19.73                 | 1                               |       |
| High                   | VPETMPPQLFEK                  |                                 |                               |                                                       | 10                           | 2.90               | 1415.728                             | 2                   | 708.368               | 2.71                  | 28.81                 | 0                               |       |
| High                   | TFLDQTGGLWASGALY GK           |                                 |                               |                                                       | 2                            | 2.82               | 1884.957                             | 2                   | 942.982               | 4.16                  | 34.31                 | 0                               |       |
| High                   | VDGAEVVVK                     |                                 |                               |                                                       | 4                            | 2.70               | 915.517                              | 2                   | 458.262               | 2.40                  | 20.49                 | 0                               |       |
| High                   | RVPETmPPQLFEK                 |                                 |                               | M6(Oxidation)                                         | 11                           | 2.64               | 1587.824                             | 3                   | 529.946               | 2.47                  | 25.66                 | 1                               |       |
| High                   | GGTPYGATTIAGGDGSRQPSQEELSIAR  |                                 |                               |                                                       | 5                            | 2.54               | 2776.356                             | 3                   | 926.123               | 2.06                  | 26.22                 | 1                               |       |
| High                   | FGNmSGQmR                     |                                 |                               | M4(Oxidation); M8(Oxidation)                          | 3                            | 2.04               | 1059.437                             | 2                   | 530.222               | 2.00                  | 7.29                  | 0                               |       |
| High                   | FGNmSGQMR                     |                                 |                               | M4(Oxidation)                                         | 5                            | 1.87               | 1043.443                             | 2                   | 522.225               | 2.78                  | 17.45                 | 0                               |       |
| High                   | QPSQEELSIAR                   |                                 |                               |                                                       | 3                            | 1.86               | 1257.646                             | 2                   | 629.327               | 2.19                  | 23.25                 | 0                               |       |

<sup>a</sup>) alphanumeric unique protein sequence identifier provided by UniProtKB/Swiss-Prot protein knowledgebase;

<sup>b</sup>) electrophoresis used to isolate protein;

<sup>c</sup>) competitor used in the elution step;

<sup>d</sup>) confidence level associated with the peptide sequence; high confidence is associated to FDR < 0.01, medium confidence to FDR < 0.05;

<sup>e</sup>) the identified amino acidic peptide sequence;

<sup>f</sup>) peptides modification at the reported amino acids position;

<sup>g</sup>) total number of identified peptide sequences (peptide spectrum matches);

<sup>h</sup>) cross-correlation score for all candidate peptides queried from the database;

<sup>i</sup>) calculated protonated monoisotopic peptide mass, in Daltons;

<sup>j</sup>) precursor ion charge state;

<sup>k</sup>) mass-to-charge ratio of the precursor ion;

<sup>l</sup>) calculated peptide mass error in parts per million;

<sup>m</sup>) retention time of the precursor ion, in minutes;

<sup>n</sup>) number of missed cleavages;

<sup>o</sup>) spot excised from 2D-PAGE of the fraction collected during competition elution step.
